# Supplementary material
Source: MDPI journal article supplement (https://www.mdpi.com/2076-3417/9/6/1177)
Supplement: s1 [file s1]

# Supplementary Data

## 1. Supplementary methods

### 1.1. Optimization of oil loaded powders using multilevel category design

The multilevel category design was conducted based on the experimental results with the data already obtained. Design Expert® 11(Stat-Ease Inc, Minneapolis, MN, USA) was used for experimental design and statistical evaluation. The experiments were designed by excluding PVP, Gelatin A, and Gelatin B as absorbents. This is due to the fact that when the above absorbents and hydrogenated lecithin and PEG40 glycerol monostearate were used as surfactants, the powders were not formed. As a categoric factor, two factors were used as independent variables. Five kinds of levels (MC, HPMC,  $\alpha$ -CD,  $\beta$ -CD,  $\gamma$ -CD) were used for the type of absorber ( $X_1$ ). The type of surfactant ( $X_2$ ) was carried out using three levels (Poloxamer 188, hydrogenated lecithin, PEG40 glycerol monostearate). The evaluation of each formulation is based on the particle size of the second emulsion (SE,  $Y_1$ ), particle size of reconstituted emulsion (RE,  $Y_2$ ), moisture ( $Y_3$ ), free oil ( $Y_4$ ), encapsulated oil (EE,  $Y_5$ ), total oil ( $Y_6$ ) and morphology score ( $Y_7$ ) (Table S1).

**Table 1.** Factors and responses used in multilevel category design.

| Categoric factor | Factors                | Levels        |                       |                   |                             |                    |                  |
|------------------|------------------------|---------------|-----------------------|-------------------|-----------------------------|--------------------|------------------|
|                  |                        | 1             | 2                     | 3                 | 4                           | 5                  |                  |
|                  | $X_1$ :<br>Absorbents  | MC            | HPMC                  | $\alpha$ -CD      | $\beta$ -CD                 | $\gamma$ -CD       |                  |
| Response         | $X_2$ :<br>Surfactants | Poloxamer 188 | Hydrogenated Lecithin |                   | PEG40 glycerol monostearate |                    |                  |
|                  | $Y_1$                  | $Y_2$         | $Y_3$                 | $Y_4$             | $Y_5$                       | $Y_6$              | $Y_7$            |
|                  | SE (nm)                | RE (nm)       | Moisture (%)          | Free oil (g/100g) | EE (g/100g)                 | Total oil (g/100g) | Morphology score |
| Goals            | Minimize               | Minimize      | Minimize              | Minimize          | Maximize                    | Maximize           | Maximize         |

Forty-five experimental compositions were run and observed responses were as like Table S2.

**Table 2.** The experimental composition and observed responses through multilevel category design.

| Run | Factors      |                | Responses |         |              |                   |             |                    |                  |
|-----|--------------|----------------|-----------|---------|--------------|-------------------|-------------|--------------------|------------------|
|     | $X_1$        | $X_2$          | $Y_1$     | $Y_2$   | $Y_3$        | $Y_4$             | $Y_5$       | $Y_6$              | $Y_7$            |
|     | Absorbents   | Surfactants    | SE (nm)   | RE (nm) | Moisture (%) | Free oil (g/100g) | EE (g/100g) | Total oil (g/100g) | Morphology score |
| 1   | $\beta$ -CD  | Poloxamer 188  | 268.95    | 374.75  | 4.1          | 39.35             | 9.66        | 59.37              | 2                |
| 2   | $\beta$ -CD  | H.Lecithin     | 237.4     | 330.2   | 3.75         | 48.04             | 10.86       | 43.78              | 7                |
| 3   | HPMC         | P.monostearate | 285.97    | 405.6   | 4.75         | 52.36             | 10.22       | 56.26              | 5                |
| 4   | $\gamma$ -CD | H.Lecithin     | 280.57    | 246.2   | 4            | 49.55             | 10.18       | 36.96              | 10               |
| 5   | $\alpha$ -CD | P.monostearate | 540.1     | 847.7   | 6.45         | 56.63             | 9.18        | 59.69              | 3                |
| 6   | $\alpha$ -CD | Poloxamer 188  | 250.8     | 360.4   | 3.55         | 38.87             | 13.74       | 58.33              | 1                |
| 7   | $\alpha$ -CD | H.Lecithin     | 257       | 216.57  | 3.75         | 52.59             | 10.27       | 52.45              | 1                |
| 8   | HPMC         | H.Lecithin     | 336.93    | 472.97  | 2.85         | 47.8              | 11.36       | 30.49              | 2                |
| 9   | $\gamma$ -CD | Poloxamer 188  | 258.95    | 293.35  | 4.98         | 37.96             | 8.66        | 56.02              | 1                |
| 10  | $\alpha$ -CD | P.monostearate | 500.64    | 789.39  | 5.25         | 51.2              | 8.92        | 55.85              | 3                |
| 11  | $\alpha$ -CD | P.monostearate | 579.56    | 906.01  | 7.65         | 62.06             | 9.44        | 63.53              | 3                |
| 12  | HPMC         | P.monostearate | 283.96    | 396.46  | 2.84         | 51.92             | 9.6         | 54.32              | 5                |
| 13  | HPMC         | H.Lecithin     | 299.11    | 457.02  | 2.78         | 47.443            | 7.72        | 22.59              | 2                |
| 14  | MC           | P.monostearate | 284.87    | 342.13  | 5.9          | 67.78             | 11.77       | 71.43              | 5                |
| 15  | HPMC         | H.Lecithin     | 374.75    | 488.92  | 2.92         | 48.17             | 15          | 38.39              | 2                |
| 16  | MC           | H.Lecithin     | 296.47    | 472.73  | 2.9          | 58.04             | 17.33       | 56.04              | 4                |
| 17  | $\alpha$ -CD | H.Lecithin     | 248.68    | 214.09  | 3.54         | 51.62             | 7.63        | 50.66              | 1                |

|    |              |                |        |        |      |       |       |       |    |
|----|--------------|----------------|--------|--------|------|-------|-------|-------|----|
| 18 | $\beta$ -CD  | H.Lecithin     | 227.26 | 292.03 | 3.26 | 46.6  | 8.84  | 40.85 | 7  |
| 19 | MC           | Poloxamer 188  | 488.85 | 600.85 | 5.1  | 48.28 | 10.85 | 66.42 | 3  |
| 20 | $\beta$ -CD  | Poloxamer 188  | 255.55 | 219.15 | 3.11 | 37.75 | 8.3   | 57.08 | 2  |
| 21 | $\gamma$ -CD | P.monostearate | 339.23 | 712.2  | 5.5  | 65.68 | 7.73  | 67.51 | 5  |
| 22 | $\gamma$ -CD | P.monostearate | 315.2  | 639.59 | 4.65 | 63.99 | 7.2   | 65.48 | 5  |
| 23 | $\alpha$ -CD | H.Lecithin     | 265.32 | 219.05 | 3.96 | 53.56 | 12.91 | 54.24 | 1  |
| 24 | $\gamma$ -CD | H.Lecithin     | 262.76 | 226.28 | 3.86 | 48.92 | 7.23  | 32.7  | 10 |
| 25 | $\gamma$ -CD | P.monostearate | 363.26 | 784.81 | 6.35 | 67.37 | 8.26  | 69.54 | 5  |
| 26 | MC           | Poloxamer 188  | 458.05 | 524.25 | 4.4  | 46.86 | 7.03  | 65.09 | 3  |
| 27 | MC           | Poloxamer 188  | 519.65 | 677.45 | 5.8  | 49.7  | 14.67 | 67.75 | 3  |
| 28 | $\beta$ -CD  | Poloxamer 188  | 282.35 | 530.35 | 5.09 | 40.95 | 11.02 | 61.66 | 2  |
| 29 | $\beta$ -CD  | P.monostearate | 354.87 | 847.7  | 3.8  | 56.63 | 9.18  | 59.69 | 4  |
| 30 | $\gamma$ -CD | Poloxamer 188  | 251.65 | 274.35 | 3.78 | 34.99 | 5.38  | 50.13 | 1  |
| 31 | MC           | P.monostearate | 279.81 | 331.19 | 4.2  | 67.36 | 10.94 | 66.91 | 5  |
| 32 | HPMC         | Poloxamer 188  | 396.85 | 483.95 | 3.5  | 36.66 | 10.3  | 56.41 | 3  |
| 33 | $\beta$ -CD  | P.monostearate | 351.58 | 789.39 | 3.23 | 51.2  | 8.92  | 55.85 | 4  |
| 34 | HPMC         | Poloxamer 188  | 393.85 | 418.65 | 3.36 | 33.4  | 9.64  | 53.94 | 3  |
| 35 | MC           | H.Lecithin     | 273.66 | 455.7  | 2.76 | 56.51 | 13.47 | 53.14 | 4  |
| 36 | HPMC         | P.monostearate | 287.98 | 414.74 | 6.66 | 52.8  | 10.84 | 58.2  | 5  |
| 37 | $\beta$ -CD  | H.Lecithin     | 247.54 | 368.37 | 4.24 | 49.48 | 12.88 | 46.71 | 7  |
| 38 | $\gamma$ -CD | Poloxamer 188  | 266.25 | 312.35 | 6.18 | 40.93 | 11.94 | 61.91 | 1  |
| 39 | $\alpha$ -CD | Poloxamer 188  | 241.9  | 310.1  | 3.34 | 36.66 | 11.76 | 55.32 | 1  |
| 40 | $\gamma$ -CD | H.Lecithin     | 298.38 | 266.12 | 4.14 | 50.18 | 13.13 | 41.22 | 10 |
| 41 | $\beta$ -CD  | P.monostearate | 358.16 | 906.01 | 4.37 | 62.06 | 9.44  | 63.53 | 4  |
| 42 | MC           | H.Lecithin     | 319.28 | 489.76 | 3.04 | 59.57 | 21.19 | 58.94 | 4  |
| 43 | HPMC         | Poloxamer 188  | 399.85 | 549.25 | 3.64 | 39.92 | 10.96 | 58.88 | 3  |
| 44 | MC           | P.monostearate | 289.93 | 353.07 | 7.6  | 68.2  | 12.6  | 75.95 | 5  |
| 45 | $\alpha$ -CD | Poloxamer 188  | 259.7  | 410.7  | 3.76 | 41.08 | 15.72 | 61.34 | 1  |

In summary, model p-value and statistical analysis were successfully carried out (Table S3).

**Table 3.** Summary of model p-value and statistical analysis.

| Response             | Model p-value | R <sup>2</sup> | Adjusted R <sup>2</sup> | Predicted R <sup>2</sup> | Adeq Precision | Importance |
|----------------------|---------------|----------------|-------------------------|--------------------------|----------------|------------|
| Y1: SE               | <0.0001       | 0.9658         | 0.9498                  | 0.9230                   | 26.47          | +++++      |
| Y2: RE               | <0.0001       | 0.9426         | 0.9157                  | 0.8707                   | 18.58          | +++++      |
| Y3: Moisture         | 0.0001        | 0.3453         | 0.3141                  | 0.2484                   | 6.64           | +          |
| Y4: Free Oil         | <0.0001       | 0.9525         | 0.9303                  | 0.8931                   | 21.20          | +++        |
| Y5: EE               | 0.0160        | 0.2574         | 0.1832                  | 0.0602                   | 5.01           | ++         |
| Y6: Total oil        | <0.0001       | 0.9218         | 0.8853                  | 0.8241                   | 18.71          | +++        |
| Y7: Morphology score | -             | 1              | 1                       | 1                        | 1              | +++++      |

\*The morphology score is R<sup>2</sup>, which is 1 because the results of three experiments were assigned the same score.

The p-values < 0.0500 indicate model terms are significant. R<sup>2</sup> values close to 1 indicate satisfactory analytical quality. It is recommended that the difference between adjusted R<sup>2</sup> and predicted R<sup>2</sup> is less than 0.2. Adeq precision measures the signal to noise ratio. A ratio greater than 4 is desirable. This means that this model can be used to navigate the design space. The degree of importance was determined by reflecting R<sup>2</sup> and Adeq precision.

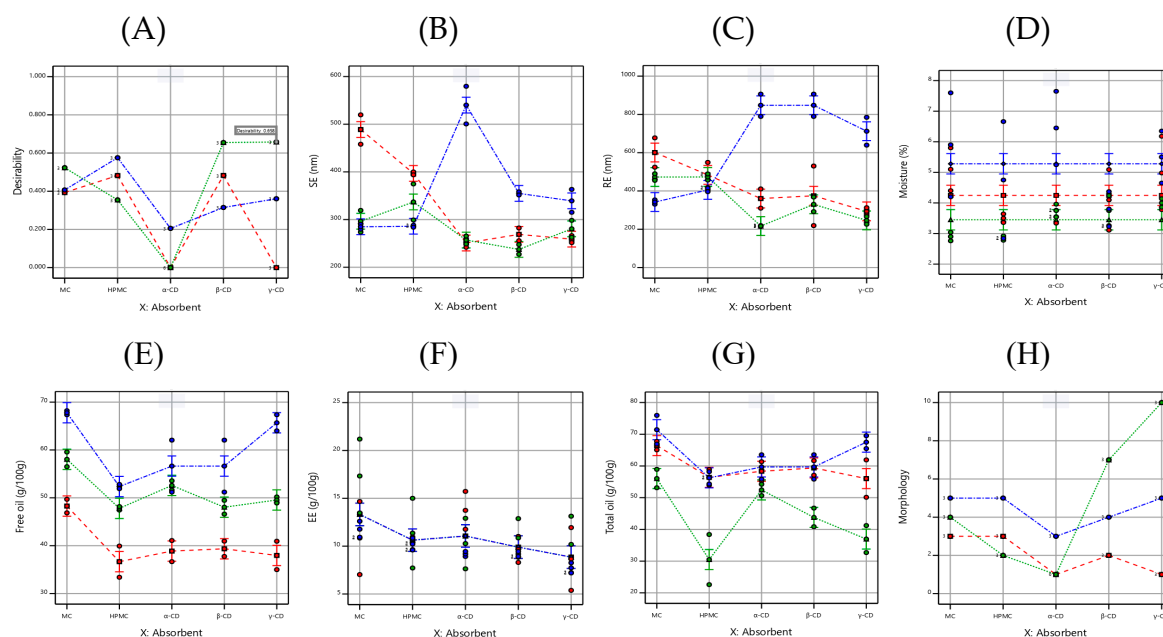

**Figure 1.** Effect of factors on responses. (A), Desirability; (B),  $Y_1$  (SE, nm); (C),  $Y_2$  (RE, nm); (D),  $Y_3$  (Moisture, %); (E),  $Y_4$  (Free oil, g/100g); (F),  $Y_5$  (Encapsulated oil, g/100g); (G),  $Y_6$  (Total oil, g/100g); (H),  $Y_7$  (Morphology score). The desirability value is calculated by reflecting the goal and importance for all the responses. The higher the value, the more the characteristics are similar to the target characteristics. Desirability value was calculated by reflecting the results of several responses according to the degree of importance. As a result, the P18 formulation (Desirability value: 0.658) was selected as the best formulation because the highest value was obtained. **Note.** (---■---) Poloxamer 188, (---▲---) Hydrogenated Lecithin, (---◆---) PEG40 glycerol monostearate.
